# Supplementary material for: Drivers for Intermittent Water Supply in India: Critical Review and Perspectives
Source: Frontiers journal article supplement (doi:10.3389/frwa.2021.696630), 2021-09-29
Supplement: Table_2.xlsx [file Table_2.xlsx]

## Sheet: SI-2.1
Supplementary Information (SI-2)
							Design aspect of Intermittent Water Supply(IWS)
SI-2.1 Literarture on Design and analysis aspects of IWS system							Articles focused on the partial filling process of pipelines
							Article focused on rehabilitation of IWS system and conversion to Continuous Water Supply(CWS) system
Sr.no.	Authors	Criteria	Objective	Methodology	Findings						Scopus indexed, 2000 and beyond, only research articles
1	Vairavamoorthy and Elango (2002)	Design and Analysis	To develop design guidelines for Water supply systemt with Intermittent Supply	The design guidelines are proposed by keeping in mind two important point viz; equity in supply and People Driven Level of Service (PDLS). PDLS includes duration of supply, timing of supply, pressure at outlet and connection requirements. The design guidelines are divided into four parts, Part 1- General overview of the network, Part 2-Preliminary design of the network, Part 3- Surveying people's…	Authors concluded that the proposed guidelines will be useful for design of WSS in developing countries. However, the guidelines are not available in public domain.
2	Fontanazza et al. (2007)	Design and Analysis	To anlayse the performance of WDN in IWS regime	The authors studied the impact of IWS regime on consumer and the distribution network. PDA algorithm from the available literature was adopted to analyse the WDN in EPANET. The household storage tank with pump was also considered in the model. Distribution network of Palermo city, Italy was considered to test the proposed methodology.	IWS has great impact on both users and the network. There is inequitable distribution of water based, based on the elevation. The pipelines will either have higher flows or null flow.
3	Vairavamoorthy et al. (2007a)	Design and Analysis	To propose new guidelines for design and operation IWS system in developing countries.	Authors enlisted the issues related to IWS system. The issues were followed by description of the proposed guidelines. The proposed model was divided into three parts viz., demand model,Secondary newtork model and modified network analysis (using PDA). Network from South India was considered to test the proposed model. Cost optimisation was also performed while maintaining the equitable supply.	The proposed model improved the performance of the WDN both in terms of cost and equitable supply. However, details of the model as well as case study were missing in the paper.
4	Vairavamoorthy et al. (2007b)	Design and Analysis	To develop a tool for identification of risk associated with contamination intrusion in IWS system	Authors developed a tool named, Improved Risk Assessment of WDS(IRA-WDS). The tool consists of three components: Contaminant zone model, contaminant seepage model and pipe condition assessment model. The tool is intergrated with GIS for maintaining spatial database. Also, the tool has GUI interface. Case study from india was selected to test the effectiveness of the tool.	The tool will help for planning the O&M of a WDN.
5	Marchis et al. (2010)	Design and Analysis	To develop model for initial filling of the network with IWS regime. In addition to develop method for modeling of household storage tank	Authors discussed the hydraulics behind the filling of pipe with different pipe filling scenarios. Then, enlisted the assumption made in the filling of the pipeline.Mathematical model for the filling of the pipelines was developed. Method of Characteristics was used to account for mechanical properties of both water and pipeline. WDN of Palremo, Italy was considered as a case study. Six pressure …	Household storage tanks modify the demand pattern of the users. In IWS system, during start of supply hour consumer demand is high than normal due to storage tank, reducing the pressure in the network. Inequality in the distribution was reported due to IWS regime, the consumer situated at lower elevation get more water compared to the consumers situated at high elevation.
6	Nyende-Byakika et al. (2012)	Design and Analysis	To develop method for simulation of filling of pipe network in IWS system	Authors derived equations for open channel flow, pressurised flow condition and transition flow condition. The basis for the equations was Saint Venant's principle. The developed equations were programmed in MATLAB and the equations were solved using Netwon Raphson Method.	The proposed algorithm can be used to determine pressure in the pipeline at give point of time. The flows can be derived from the pressure values. The data of flow and pressure can be used to manage the network. The inlet head and inflow rate governs the pressurization of the pipeline. Also, the speed of filling the pipeline is important, rapid filling gives rise to steep surge front against the …
7	Nyende-Byakikaa et al. (2013)	Design and Analysis	To develop tool for analyse of WDN during low and non-existent pressure situations.	Authors proposed simulation methodology for pressurised WDN prone to transient low pressure open channel flow condition. The proposed framwork has three standalone models, Demand Driven model for normal flow condition, HAD model for low pressure analysis and modellign pipe filling and pressurisation. WDN of Kampala city was considered as case study. Detailed schematice diagram was proposed for an…	The proposed framework can help in improving the operation of IWS system
8	Manohar and Kumar (2014)	Design and Analysis	To model equitable distribution of water in IWS system	WDN of Banaglore was considered as case study. A Dyanmic Inversion (DI) nonlinear controller with Propotional Integral Derivative (PID) was used for throttling the valve to achieve desired flows in the different zones. Equitable water distribution in different zones of the city was modeled using EPANET. The calibration for valve settings was done by minimizing the error value between the observed…	The proposed model can be used as decision support system for IWS system for achieving equitable water supply.
9	Mohapatra et al. (2014)	Design and Analysis	To propose methodology for assess the performance of WDN with IWS regime	EPANET was used to simulate part of WDN of Nagpur, India. GIS maps, field survey data, pressure and water quality data collected from site was used in the simulation. Artifical reservoirs were used to replicate household storage tanks. MCS was used to derive the demand multipliers for CWS regime. Water quality simulation was also performed for the study area.	Authors concluded that the network was not suitable to maintaint the desired headloss, specially in main line. Need for parallel pipe with larger diameter was highlighted to reduce the O&M of the network. Low pressure, and high water age was result of IWS regime. Before switching to 24*7 water supply, rehabilitation of distribution mains and critical pipes is vital.
10	Neelakantan et al. (2014)	Design and Analysis	To propose methodology for optimal expansion and upgradation of IWS system	Authors developed optimisation-simulation model, in which optimisation is done using Differential Evolution Algorithm and EPANET was used for simulating the network. The objective of the optimisation was to minimise the cost of expansion with four set of constraints: conservation of mass balance at each node,failure of only one link at a time,energy conservation,minimum pressure requirement and c…	Authors concluded the reliability was increased due to conversion of branch network to looped network. Effective water quality management, asset management and communication with consumers is important to maintain the performance of the network.
11	Haddad et al. (2016)	Design and Analysis	To propose a optimisation model to cater the consumer welfare and system depreciation simultaneously in WDN with IWS regime.	Objective of the optimisation model was to improve the water supply resiliency and mechanical relability of WDN. Optimisation model was solved using HBMO algorithm linked with EPANET. The developed methodology was tested on loop network from the literature and real WDN from Tehran, Iran	Authors highlighted that, IWS system reduces both resiliency and mechancial relability of WDN. When mechanical relability was considered for single objective optimisation, it reduced with increase in shortage of water supply. But 100% resiliency was achieved even in the water shortage condition. However, in the multi objective optimsation, both the objectives are in conflict, as resiliency increa…
12	Lieb et al. (2016)	Design and Analysis	To develop methodology for modelling the transient flow through WDN in urban areas of developing countries	Preissman slot model was used in the proposed computational framwork. Numercial model was developed to include different hydraulic constraints in the model. Optimisation is performed to improve the performance of IWS system.The final computational code was written in C++ and simulation was done in EPANET. The proposed model was validated by comparing the results with the published data set.	Preissman slot is useful for both pressure gradient optimisation and boundary value recovery. However, other optimisation tools should be used to reduce the pressure gradient.
13	Campisano et al. (2018)	Design and Analysis	To evaluate the potential of EPA SWMM software in simulation of pipe filling process in IWS system	Filling process of two IWS system was used as case study. For the first case study (WDN of Sicily, Italy), simulation results from EPA SWMM were compared with the field data. The simulation results of second case study (small village from North Italy) were compared with a model based on the theory of Rigid Water Column.	EPA SWMM can be used for range of simulations of hydraulic process of WDS with IWS regime.
14	Achi and Rouse (2020)	Design and Analysis	To propose theortical hybrid hydraulic model for including both IWS and CWS in the modelling.	Gradual transition from IWS to CWS WDN of Amman, Jordan was used as case study. Zone by zone transition was proposed for CWS upgradation. The hybrid model was used to simulate the zone by zone upgradation of the network. Demand of surrounding zones was added to the demand pattern of the upgraded zone to maintain equity.	CWS can be achieved without additional water source.
15	Mohan and Abhijit (2020)	Design and Analysis	To propose methodology for modelling the partial flow regimes in IWS system	Authors developed improved PDA, PDA-PF which incorporates partial flow characteristics. The principle behind the model was, difficency in pressure results into partial flow regime. Uncontrolled orifice based demand were used to model the variable IWS demand at the nodes. Results of PDA-PF were compared with original PDA analysis. A part WDN of Madurai, Tamil Nadu, India was considered as case stu…	For one fourth of total flow duration, partial flow regime was oberved in the WDN. The results of partial flow in pipeline and stagnation can be used for water quality modelling.

## Sheet: SI-2,2
Supplementary Information (SI-2)							Review studies on causes and effects of IWS
							Quantification of water loss in IWS system
SI-2.2 Literarture on operation aspects of IWS system							Water quality issue in IWS system
							Inequitable water supply due to IWS system
							Conversion to CWS
							Impact of IWS on WSS
							Database management
Sr.no.	Authors	Criteria	Objective	Methodology	Findings
1	Al-Ghamdi and Gutub (2002)	Operation	To propose method for estimating the leakage in IWS system	Authors discussed about different leakage estimation techniques.WDN of Makkah City was considered as case study. Pressure test method was used to detect the leakage in the WDN. In this method, the WDN is divided into small manageable zones and pressure tests is conducted for each zone.	Water loss is exceptionally higher in the older part of the WDN. Author suggested reduction in system pressure may reduce the leakage rate. However, author emphasised need of regular leak detection in the WDN using appropiate techniques.
2	Coelho et al. (2003)	Operation	To understand the factors controlling the bacterial conatmination in Intermittent supplies	Authors considered five case stuies viz; WDN of Amman(Jordan),Byblos(Lebanon),Nablus(Palestine),Seahouses, (UK) and Caparica (Portugal). The water quality data was collected in summer and winter to understand the impact of seasonal variation. Authors also considered the influence of household storage on quality of water. Finally, a mathematical model was developed to understand the bacterial grow…	Apart from the ill effects of IWS on water quality like stagnation of water, growth of bioflims and its detachment due to velocity and pressure variation, household storage is a vital component responsibe for deteroiation of water quality in IWS system.
3	Tokajian and Hashwa (2003)	Operation	To determine factors affecting the quality of water in IWS system	A controlled study in Lebanon was conducted for 12 months. Enumeration of coliforms and Heterotrophic plate count bacteria was done. Then statistical anlaysis was done on the data collected using SPSS software package	Varied pressures,water stagnation, infiltration, line breaks,turbidity, regrowth, non uniform chlorine residuals and hosusehold storage tanks are the contrbuting factors responsible for deterioration of water quality.
4	Ayoub (2006)	Operation	To study the impact of IWS on water quality	A eight month long study was conducted in Beirut, Lebanon, during which water samples from municipal household taps and household storage tanks were collected. Authors also highlighted different water quality aspects under IWS like, microbial regrowth,storage tanks,stagnation and water retention, backpressure,seasonal variation, and water supply pattern and type of supply.	Authors suggested some water quality control strategies like database management related to bacterial trends and biofilm accumulation, inclusion of additional testing parameter like total trihalomethanes, leak detection and repair policies, and awareness about safe household storage. Prioritisation of remedial actions, compliance with standards and guidelines, impact assessment, rapid identificat…
5	Andey and Kelkar (2007)	Operation	To compare performance of WDN in CWS and IWS regime	WDN from Ghaziabad,Jaipur,Nagpur and Panaji were selected for the study. As preparatory work, the WDN of the study area were updated, valves and bulk meters were installed to form different hydraulic zones. Every household was installed with stopcocks and water meters. Additionally, household survey was conducted to get consumers feedback regarding the water supply service. Data regarding, per ca…	Authors concluded appreciable improvement in the pressures,flow patterns and water quality in CWS regime. However, consumption and NRW increased in CWS regime compared to IWS regime. Timing and duration of IWS regime has significant impact on per capita consumption, pressures, peak factor and NRW. Consumer survey indicated that, adequate quantity of water is important factor for consumers irrespe…
6	Rosenberg et al. (2008)	Operation	To enlist and compare different supply enhancement and demand management actions for improvement of IWS	Authors considered city of Jordan as a case study. Household survey was conducted in the study area. The interventions were divided into two parts viz., long term option and short term options. In total 16 supply enhancement and 23 demand management options available in study area for improvement of IWS system were discussed.	The selection of intervention was based on the financial capacity of individual, water demand , quality of water, and volume of water saved. The long term options requires proper planning and high investments. The anlaysis presented in the work can be useful to identify cost effective, water efficient actions, clarify interactions among potential management actions, and develop strategies for dif…
7	Andey and Kelkar (2009)	Operation	To evaulate the influence of IWS and CWS regime on household consumption	Authors considered four cities from India viz., Panaji, Nagpur,Jaipur, Ghaziabad as study area. The household water consumption was determined using water meter readings. The WDN were switched to CWS regime for few months with prior information.Additionally, household survey was conducted to collect information about the socioeconomic status, fulfillment of monthly water consumption, duration of …	Authors concluded that, short duration of water supply with adequate pressure than the long duration of supply with less pressure can satisfy the consumer demands. Also, significant increase in the water consumption, NRW and leakages was reported in CWS regime. Authors highlighted the need to syudy the water consumption pattern for different set up like slums, smaller and metro cities to conclude…
8	Criminisi et al. (2009)	Operation	To evaulate the influence of water meter age and household storage tanks on apparent losses	To test the impact of water meter age, 180 revenue meters were tested in the laboratory, the meters were considered from 0 to 45 years in age. The impact of household storage was studied using field data from five households of city of Palermo, Italy and mathematical modeling. The mathematical model represented the tank filling process, variation in the tank inflow based on network pressure, floa…	Authors concluded, the measuring error increases with age of water meter even for meters with less than 15 years ago. Private storage tanks amplifies the apparent losses of the system due to increase in the under registration of the water meters.
9	Al-Ghamdi (2011)	Operation	To derive relationship between pressure and leakage in IWS system	A part of WDN of Makkah, Saudi Arabia was considered for the study.Noise correlators were used to detect the leaks in the WDN. Relationship between pressure and leak rate present in the literature was used. Data from the field was applied to the pressure-leak rate relation.	Leakage rate is propotional to the pressure raised to the nth power. The nth power varies as per the pipe material and age of the network. The household connections are more susceptible to leakages. Performance of GI pipes as household connection is not good due to its corrosive nature.
10	Elala et al. (2011)	Operation	To study the different factors responsible for contamination of water in WDN with IWS regime	WDN of Nagpur, India was selected as case study.Authors conducted household surveys to collect quantitative data and water samples were also collected to determine the quality of water. Data regarding sanitation facility was also collected from the households.	Authors concluded that the deteroiration of water quality happens beyond the household tap connection. The major factors responsible for the contamination are improper storage design,inappropiate extraction practices and access to children. Lower economic strata people experiences more problems of contamination. Additionally, due to IWS regime, the groundwater enters the supply system and contami…
11	Christodoulou and Agathokleous (2012)	Operation	To study the effect of IWS on vulnerability of urban water supply system	WDN of Nicosia and Lemesos, Cyprus was considered as case study.Data regarding breakage incidents,operating network parameters and, external factors and vulnerability assessment was collected. Dataset for both the WDNs was collected from the government agency for the past 4 years. Survival analaysis technique was used to analyse the data.	Increase in the pipe burst, NRW and maintenance cost was reported when the WDN were operated with IWS regime
12	Klingel (2012)	Operation	To enlist the technical causes and impacts of Intermittent Water Supply (IWS)	Different IWS definition were discussed. Technical causes and impacts of IWS were discussed in detail	Main technical cause was reported as deficiency in system concept, knowledge and planning and infrastructure management.
13	Tamari and Ploquet (2012)	Operation	To determine the leaks in building with roof tank	Roof tank is commonly used in IWS system. Authors have considered six buildings from Mexico as case study. The water level in the tank was monitored for 4 weeks with a time step of 1 min. The raw data was analysed using the proposed algorithm (written In MATLAB). The observed water level is converted to the volume of water stored.	The proposed methodology cannot be used at commercial scale due to high cost of instrument and complex coding for the analyse. However, it can be used for research purpose to calculate the leakage in IWS system
14	Abu-Madi and Trifunovic (2013)	Operation	To study the impact of supply duration on IWS system	West Bank, Jordan is considered as case study. Authors described in detail the problems associated with the water supply system in the study area. All the WSS in the area are operated intermittently. This leads to household storage, which in turn modifies the demand pattern exerted on the system. Authors have classified different regime pattern (CSCD,CSID,ISCD, and ISID) based on the water supply…	If the WDN is designed for IWS system, the size of optimal pipe diameters becomes significantly high, which turns to be expensive and unfeasible. Studying the local conditions thoroughly is necessary to avoid reduction in supply hours. Additionally,improving governance, increasing water tariffs, reducing leakages, water conservation, involving private sector and improving water diplomacy should b…
15	Ameyaw et al. (2013)	Operation	To develop methodology for equitable supply in IWS system with minimal investment	Authors have developed spreadsheet based multi objective opitmisation model, GANetXL for minimising the inequity and the cost. EPANET is used to simulate the WDN with storage tanks, using pressure dependent analysis. Optimisation model includes supply and tank status as constraint. The developed methodology is tested on the network from the literature. The main focus of the methodology is achieve…	Authors concluded that the inequity in IWS system is measurable and can be improved by optimal location and sizing of elevated tanks. However, other variables like reliability, efficiency , water quality and individual costs should be considered in the model.
16	Fontanazza et al. (2013)	Operation	To estimate energy cost for different tank configurations in IWS system.	Authors proposed node demand model to incorporate the behavoiur of underground and overhead tank. EPANET was used for simulation..Part of Palermo, Itlay WDN was used as case study. The network was analysed by first considering CWS without storage tank, pumping only when pressure is lower than minimum pressure, then all users with OHT and pumps and all users with UGT and pumps. Four PI were define…	UGT utilise more energy compared to OHT. IWS system caused inequalities in expenditure of consumer based on the location. Advantage users may not need pump, whereas disadvantage users need pumps to fulfill the demand.
17	Kumpel and Nelson (2013)	Operation	To compare water quality in CWS and IWS regime	Authors collected water sample of 3919 household from Hubli-Dharwad,India over a year. Water samples were collected from reservoirs, consumer taps, and from household storage. The water samples for tested for total coliform, Escherichia coli, turbidity, free chlorine and combined chlorine.	Authors concluded that the water quality is the reservoir was unaffected by change in supply regime. However, high concentration of E coli was detected in water supply at tap in IWS regime.Rainy season further declined the water quality in IWS regime. Authors highlighted usage of household storage in both CWS and IWS regime, which affects the water quality.
18	Marchis et al. (2013)	Operation	To develop methodology for evaluating the apparent losses due to meter under registration in IWS system	A mathematical model comprised of hydraulic network module, PRV module, pressure driven demand module and an apparent loss module. The model was also capable of modeling the household storage. The proposed model was used on WDN of Palermo, Italy.	Authors concluded that the installation of PRVs increase the apparent loss in the system due to increase in meter under registration. Also, the household storages deteroirates the water meter, increasing the apparent losses.
19	Fan et al. (2014)	Operation	To understand the effect of restricted water supply on domestic demand in rural areas of developing countries.	Authors conducted household survey in 225 households from villages within Yangling district, China. The information related to domestic water consumption (indoor and outdoor), household water activities and socio economic characteristics was collected. Statistical analyais on the collected data was done using SPSS software.	Authors concluded IWS system reduces the domestic water consumption. But, it compromises the hygiene behaviour and increases water sharing among families. The reduction in supply hours affects the outdoor activities, indoor activities are affected when water supply is aroun 1 to 1.5 hrs per day. Differenr water use activities should be considered while deriving daily water duration requirement in…
20	Freni et al. (2014)	Operation	To develop methodology to model the dynamic behaviour of WDN due to IWS with the help of PRVs.	Mathematical model of pipe filling from the literature was upgraded by adding PRV model to analyse the dyanmic nature of WDN. The proposed model was applied on WDN from Palermo city, Italy.	Authors highlighted the importance of PMA(using PRVs) to improve equity in IWS system. High pressures are observed in the U/S of PRVs in the network.
21	Gottipati and Nanduri (2014)	Operation	To improve equity in IWS system	Authors defined "Uniformity Coefficient" to quantify the equity of water at the demand nodes. Authors developed iterative head driven analysis propose to calculate the UC. The effect of different WDN parameters like water level in tank, and average supply ratio on UC was studied. Network from the literature was considered as case study.	Authors conclude the location of tank and the layout of the network are vital component in maintaining equitable supply. Minimum water level should maintained in the tank to have equity in the supply. In the existing WDN, straggering of the supply can improve the equity in water supply
22	Haddad et al. (2014)	Operation	To assess the formation and occurrence of Disinfection By Product in IWS system	A laboratory setup was developed to check relation between Chlorine, BOD,pH, temperature on DBP (Trihalomethane, TTHM).	Apart from Chlorine, the TTHM formation is influenced by pipe material, BOD contamination level and incubation of water in pipe. TTHM formation was more in old steel pipes and least in PVC pipes. TTHM formation is directly proportional to incubation period.
23	Klingel and Nestmann (2014)	Operation	To propose conceptual model for conversion of IWS system to CWS system	The conceptual model highlight the importance of database management. The model has following steps, data management and hydraulic analysis, pilot study,planning restructuring, information and awareness raising, implementation of restructuring, introduction to CWS, and adaptation to restructuring plans. Existing WDN from Beni Abbes, Algeria was considered as case study. The WDN in the study was d…	Authors highlighted the importance of supply pressure and minimisation of NRW for achieving CWS. The system components must be good functioning condition and frequent O&M is must. Also, Consumer behaviour was also important factor for the conversion
24	Kumpel and Nelson (2014)	Operation	To understand the mechanism of water quality in IWS system	Data from Hubli Dharwad, India was collected to understand the effect of IWS on water quality. Three methods for sampling were used: Multi parameter physiochemical sensor, pressure sensor and grab samples for testing indicator bacteria.	Water quality was deteoirated at the start of supply hours. Contamination was observed at low pressure area even chlorine residual is present, highlight presence of intrusion or backflow. When the pressure is increased, contamination of water can be happen by one of the mechanisms Transient intrusion, backflow, release of particulates and sloughing of biofilm from pipe line.
25	Ercumen et al. (2015)	Operation	To compare CWS and IWS regime with respect to water brone illness, child mortality and weight for age	A match cohort study with multivarirate mataching to identify the CWS and IWS regime areas in Hubli Dharwad, India was conducted.Data from 3922 households was collected to report cases of caregiver health diseases and weight for age of children was also recorded.	Point of use water contamination from continue water storage was reponsible for the water borne disease. CWS reduced the transmission, especially in slum areas.
26	Jayaramu et al. (2015)	Operation	To analyse the feasibility of conversion from IWS to CWS system based on the design capacity of the network	Demonstration zone of Hubli Dharwad, India was considered as case study. Bulk water demand was compared in both the regime. Two forecast models ARIMA and MVR were also developed by authors to predict the future system capacity.	Authors concluded that the expansion of 24*7 water supply throughout the city will require increased system capacity. Water rationing should be avoided to cater the increased future demand. World Bank claims that conversion of CWS reduces the burden on water resources, however validation is missing.
27	Solgi et al. (2015)	Operation	To propose a optimisation model for optimal scheduling in IWS system considering principles of equanimity and justice in WDNs.	Authors developed optimisation model to determine optimal scheduling in IWS system. The model was developed to include equanimity and justice principle. Two efficiency criteria were considered by the authors: relability and resilience. Two case studies were considered to test the developed model. The first case study was loop network from the literature and the second was real network. HBMO algor…	IWS regime leads to increased average pressure head in the network. IWS system preserves the equanimity and justice principle.
28	Agathokleous and Christodoulou (2016)	Operation	To estimate the effect of IWS on condition and breakage rate of UWDN.	The vulenabiility assessment was considered using three aspects: Component analysis, topology and connectivity and operating parameters.Authors analysed the data related to pipeline failure before and after IWS using statistical and survival analyses. 8 years data was collected from WDN of Cyprus city was used for the study.	In IWS regime, majority of the pipeline failure occurred in houshold connection. Overall IWS regime proves to be determental to condition of WDN.
29	Galaitsti et al. (2016)	Operation	To study the complex inter relation between the causes and effects of IWS	Different keywords used by authors to gather literature related to various aspects of IWS and impact on consumers. Authors identified 47 conditions of intermittency	Author highlighted the lack of consistency in the definition of intermittency. Hence, suggested following definitions Predictable intermittency, Irregular intermittency, Unreliable intermittency.As the water access becomes less reliable, the consequences for the consumers become more problematic. Hence, bifurcating the type of intermittency is important to provide interventions accordingly
30	Grimmeisen et al. (2016)	Operation	To propose methodology for testing the combined impact of urbanisation activity, IWS and water losses on groundwater quality.	WSS of As-Salt, Jordan was considered as case study. A down gradient spring and observation well was selected to test the impact on water quality due to IWS and leakages from sewer. High level water monitoring was used to record the quality of water in two dry seasons. Nitrate, E-coli, spring discharge and well water level was considered in the study. Auto correlation and cross correlation was do…	Weekly variation in the contaminates, dischagre and water level of the well is done to IWS system. Sewer leakages contaminates the groundwater. IWS results in complex water cycle
31	Hernandez-Lopez et al. (2016)	Operation	To study the water demand, residence time and disinfectant mixing in rooftop tank	Physical,numerical and theoretical models were used to achieve the objectives of the study. Tracer tests were conducted on real scale transparent laboratory storage tank. Residence time experiment was conducted with use of three parameters, with one CFSTR with a bypass. CFD was used to visualise the result. Water consumption from the storage tank was model using household fixtures, and stochastic…	The instantaneous flow rate withdrawal from the storage tank is less by the household fixtures for system with roof tank. Also based on the numerical model, the peak factor was high in IWS system than CWS.
32	Ilayza-Ayza et al. (2016)	Operation	To propose a methodology for improving the network capacity of IWS system	Theoretical maximum flow was used as a indicator for network capacity, it proves vital for the decision making,assessment, management, maintenance, exploitation and design of WSS. The maximum theoretical flow required was compared with flow required in CWS to evaluate the network capacity of IWS system. System setting curve was proposed in the study. WDN of Oruro, Bolivia was used as case study.	Poorly planned expansion reduces the network capacity, results in low pressure flow failure in unfavourable areas. This is considered as water scarcity instead of reduced network capacity and hence IWS system is applied, which increases the problems. Transition from IWS to CWS to include gradual pipe replacement strategy with minimal cost and increased network capacity.
33	Khadse et al. (2016)	Operation	To assess the drinking water quality in the Indian urban area	WSS of Bhopal, India was considered as case study. The water quality was tests were performed at the different WTPs which feed water into the distribution system. Water quality was checked at ESRs and the different location in the distribution system.	IWS deteoriated the water quality due to leakages, intrusion as a result of negative pressure. Additionally leakages from sewer reduced the water quality.
34	Kumpel and Nelson (2016)	Operation	To examine the status of IWS in World, nature of IWS and its effect on water quality	Authors used IBNET database to calculate the status of IWS throughout the World. Literature review on studied of water quality in IWS system was conducted.The authors focused on the microbial contamination in IWS system. The impacts of water quality were categorised into two parts viz., intrusion and backflow and biofilm, loose deposits and microbial growth.	Authors highlighted the need for improved water quality monitoring in IWS system, emphasised on need of descriptive research to improve the understanding of current IWS practices and methods to reduce the water quality risk associated with IWS system
35	Zyoud et al. (2016)	Operation	To propose integrated water loss management strategies for developing countries.	A decision support tool was developed using MCDA. Authors developed hierarchical structure of decision problem which comprise of four layers: Overall objective (reducing water loss), main criteria (economic, technical,environmental and socio economic), evaulation criteria (revenue generation, O&M cost,water preservation, energy saving, supply relability, affordability etc) and options (Active lea…	Pressure management and control strategy are most prevalent, followed by advanced techniques and DMA formation.
36	Agathokleous et al. (2017)	Operation	To compare the performance of UWDN in CWS and IWS regime	Authors used two models to compare the performance of the UWDN. Decision tree method was used to test effect of variation of different parameters on performance of WDN. Then survival analysis was done on WDN in both CWS and IWS regime. WDN of Nicosia was used as study area. Performance related data for six years was used for the analyses.	After introduction of IWS regime, water loss incidents increased, deteroirating the WDN. Particularly in Household connections. Some pipe materials performed better even in IWS regime. But majority of the pipe material deteroirated in IWS regime.
37	Bivins et al. (2017)	Operation	To estimate global infection, morbidity and moratality associated with IWS regime.	Authors quantified the total population exposed to IWS regime.Quantitative microbial risk assessment (QMRA) was used to achieve the objective of the study. MCS was used to estimate the risk of infection to human life with respect to three selected pathogens.	Authors highlighted that increased residual chlorine in WDN with IWS regime can be used in the absence of massive investment in pipe upgradation. Additionally household treatment of drinking water can help to improve the water quality.
38	Erickson et al. (2017)	Operation	To understand relationship between IWS regime and water quality.	Four zones of distribution network from Arraijan, Panama was used as case study. The zones considered were having combination of CWS and IWS regime. Authors proposed special monitoring techniques for IWS regime, like continuous pressure monitoring, water sampling from the first flush.	The proposed monitoring techniques for IWS regime will improve detection of threat to water quality.
39	Hastak et al. (2017)	Operation	To report the results of the conversion of IWS to CWS regime at pilot scale in Nagpur, India	Data related to infrastructural,operational, managerial and financial capabilities were used to determine the SLB per and post CWS intervention to quantify the improvement	Authors reported imporved efficiency in CWS regime after direct conversion. Reduction in water loss, water saving in per capita supply, improved water quality. However, scaling up of the conversion is difficult.
40	Ilayza-Ayza et al. (2017)	Operation	To develop method for implementation of DMA in IWS system	Methodology based on hydraulic capacity concept using soft computing tools of graph theory and cluster analyasis was to form DMAs for equitable water supply. The methodology was based on three goals: achieve supply equity, opinion of service provider and finding adequate supply hours for sectors. High level pseudocode was developed by authors for implementation of hydraulic constraints. EPANET wa…	Important to maintain the supply schedules of each sector to maintain equity. Sectorisation should be done with miminal number of isolation valves to achieve the improved efficiency of WDN.
41	Mastaller and Klingel (2017)	Operation	To propose methdology for calculating water balance in IWS system	IWA water balance was adopted for IWS system with flat rate tariff without metering. Modifications was done in the IWA water balance to incorporate the effect of household storage. Small part of WDN of Tiruvannamalai, India was used as case study.	Operational indicators will help in priortizing the water loss reduction activity between distribution network and household connection. Financial indicators help in quantifying NRW. The proposed performance indicators can be used to tackle water losses in distribution network.
42	Strijdom et al. (2017)	Operation	To evaluate the sub standard pressures in WDNs in South Africa	Authors reviewed the existing minimum pressure criteria in different countries. A quantative theortical approach was used to evaluate the effect of MPH during peak flow.Hydraulic modeling of WDN from 71 South African cities was done. A modified demand driven analysis was used to simulate the hydraulic models, WADISO software was used for hydraulic simulation of network. Data from water meter was …	The principle of designing for theortical peak hour demand condition for most critical node in the system leads to increase in the overall MPH.
43	Al-Washali et al. (2018)	Operation	To analyse the leakage rate, leakage components and leakage reduction potential for IWS system	MNF process at DMA level was used to determine leakage of WDN of Zarqa, Jordan. The upscaling of MNF to full WDN was studied. Also sensitivity analyse on the rate of rise of leakage and infrastructure condition factor was done to check the feasibility of leakage reduction measures. Leakage reduction measures like pressure management,leakage detection, response time minimization were analysed in t…	MNF cannot be used to calculate leakage in IWS system as the water is flowing through the network at night for filling the household storage tank. Generalising the results of MNF for the whole day causes overestimation of leaks. MNF is good at DMA scale but upscaling does not provide desired results. Pressure reduction reduces the failure frequency but pose difficulties in detecting the leaks.
44	Aboelnga et al. (2018)	Operation	To provide structured analysis to determine volume of leakage and its component in IWS system	WDN of Madaba, Jordan was used as case study. The real loss component were determined using Burst and Background Estimate (BABE) and data of network failure. Impact of potential intervention like pressure management,chronic leakage survey and response time minimization was studied	Authors suggested pressure management and active leakage control can reduce the real losses. Additionally, proper database management and response policies can help reduce the reported failures.
45	Cronk and Bartram (2018)	Operation	To propose analyase approach for the data collected regarding rural WSS	SIASAR- Rural Water and Sanitation Information System, developed to monitor rural water supply schemes. In accordance with SIASAR, data collected from WSS of Honduras, Nicaragua and Panama were used as case studies. Multivariate regression and Bayesian network was used to anlayse the different parameters from SIASAR. The regression model was compared with SIASAR sustainability matrix.	Infrastructure quality, availability of external technical support and funds to rehabilitate system were main reasons for IWS system. The system analysis approach can be used to other low and middle income groups.
46	Ilayza-Ayza et al. (2018)	Operation	To propose gradual transition from IWS system to CWS system	Authors proposed a gradual transition of IWS system to CWS system based on optimal sector selection for upgrading to CWS system. Sector selection was based on quantative and qualitative criteria to achieve equity in the supply. Quantative criteria account for the physical and hydraulic variables of the system and qualitative criteria is based on service providers percepetion. Finally network topo…	Water supply equity index was proposed by the authors which considers uniformity in the water supply and hydraulic capacity to satisfy the consumers demand. Leakage of each sector can be added to the proposed model.
47	Kumar et al. (2018)	Operation	To propose a framework for analysising the failure reasons of a informational intervention	Authors discussed NextDrop, a new information based intervention tried in Bangalore, India to give accurate information about the supply timing to every household. The reasons for failure of the intervention were also discussed. Finally, a framework was proposed by the authors to understand the critical reasons for failure of such interventions.	Authors listed six leakages or blockages in the information based intervention: failure to collect the intended information, failure to perform intended analysis,failure to disseminate the intended information, non receipent of information by consumers due to technical or other factors, non registration of consumers and feeding inaccurate information. Highlighted the importance of social studies …
48	Kaminsky and Kumpel (2018)	Operation	To derive correlation between water utility benchmarking and IWS system	Benchmarking data from IBNET for 2014 was used for the analysis. Logistic regression model was run on each water supply related variables and 42 statistical significant variables were selected by the authors. Authors bifurcated the variables into following themes: physical infrastructure system scale,coverage, consumer type, public water points, financial and NRW and metering.	NRW measurement is very context specific, it should be carefully compared for two utilities. Study reported only correlation between the variables, they might be the cause and effect of IWS system. There is need for characterizing the typologies of IWS system for appropiate solutions. The best indicator is population and demand rather than physical infrastructure. Global indicators must include c…
49	Mokssit et al. (2018)	Operation	To propose methodology for assessing service quality of WSS with IWS regime	Total 12 operators working on WSS with IWS regime through out the World were interviewed.Literature review on IWS regime was done to understand causes and effects of IWS system. From literature review authors classified the problems with IWS system as Health issues, Technical problems and social and political problems.	Authors proposed framework for assessing the service quality of WSS with IWS regime
50	Simukonda et al. (2018a)	Operation	To understand the external and internal causes responsible for IWS system	Lusaka water and sewerage company, Zambia was used as case study. Authors used desk study and interviews with key stakeholders for the data.	External factors include poor governance, demographic and economic dynamics, hydrologic regime change, poor system management and operation, unplanned network expansion, limited skilled manpower, poor electricity supply and lack of consumer awareness. Internal factors include excessive leakage, apparent water losses and poor compliance for water bills. Interdisciplinary approaches are recommended…
51	Simukonda et al. (2018b)	Operation	To review some key water supply intermittency casual factors, problems and options for managing them	Causes and problems of IWS were discussed	Wherever direct conversion from IWS to CWS system is not practical, appropriate design and operation interventions for improving IWS system should be studied and applied, as per requirement
52	Taylor et al. (2018)	Operation	To propose methodology for evaulation of leakages and intrusions in IWS system	Authors proposed analytical model relating supply pressure,supply duration, leakage and volume of intruded, potentially contaminated fluids present during flushing. Equivalent Orifice Area (EOA) was proposed to quantify water quality. The proposed relationship was tested on performance indicators for IWS in India.	Increase in the supply duration might improve water quality during flushing phase, however decreases the subsequent steady state water quality. The volume of intrusion of fluid is directly proportional to EOA. Water quality should be measured in both steady state and flushing state for IWS system. Authors suggested full pipe replacement for upgradation of IWS to CWS. Reduction in EOA should be fo…
53	Alazzeh et al. (2019)	Operation	To evaluate impact of IWS on water quality	WDN of two refugee camps in Palestin were considered as case study. Total 718 water samples were collected from study area in span of one year. Parameters tested were total coliform, E coli bacteria and residual chlorine. Samples from community water tank, distribution network and rooftop tank were collected	The water quality was more deteroirated in rooftop tanks. Authors raised couple of questions regarding water quality in IWS system. First was, how should be responsible for maintaining good water quality in IWS system, where consumers are compelled to use rooftop tanks and second to what extend the awareness among the consumers should be raised regarding long term storage.
54	Al-Washali et al. (2019)	Operation	To study the impact of supply duration on NRW assessment in IWS system	Authors analysed the effect of SIV by varying the supply timing and constant pressure on Pis of NRW. Different Pis for NRW are UARL, ILI, average pressure, volume of leakage and frequency of repairs. WDN of Sana, Yemen was used as case study.Authors highlighted the need for normalisation for calculating the NRW and comparing different WDN. Normalisation was done using Regression analysis and aver…	Increase in NRW level does not necessarily indicates worst performance, it can be due to increased water supplyRegression analysis can be used for comparing the NRW within the system only wheras for comparison of two different WDN average supply time adjustment should be used.
55	Haider et al. (2019)	Operation	To develop framework to establish Economice Level of Leakage (ELL) for IWS system	The proposed framework consists ground level data collection before the leakage control, MNF to calculate CARL, then UARL and ILI is calculated. Base on ILI ratio leakage control methods are applied. Finally cost benefit analysis is done to achieve ELL. Framework was implemented in Alryan, Kingdom of Saudi Arabia. MNF was conducted to establish relationship between pressure and water losses.	Water main leaks, service connection failures and crack in the storage tanks are main reasons for real loss. Pressure management is recommended to reduce water loss with the help of smart pressure gauges
56	Matsa et al. (2019)	Operation	To study the failure reasons of WSS system in Gweru, Zimbabwe	Mkoba, a neigbhourhood in Gweru City, Zimbabwe was adopted as case study.Qualitative and quantative data was collected using household survey, household water quality tests, and field observations. Authors incorporated Purposive sampling for collecting data from stakeholders and convenience sampling was used for collecting household water quality data.	Authors concluded that, IWS regime deteroirates the water quality,additional unhygenic sewerage activities increase the bacterial contamination in water. Gender disparity for collecting water was also reported. The coping strategy is directly correlated to the household income.
57	Rubino et al. (2019)	Operation	To propose methodology for examining the water quality in IWS system	Water samples were collected from Guadalajara, Mexico and parameters tested were E coli, total coliform bacteria, and chlorine residual. Also, household survey was conducted to understand the consumer perception to the water quality.	Authors suggested detailed study to understand the effect of rooftop tank on water quality in better way. The city planners and consumers should work together to improve the water supply infrastructure.
58	Santos et al. (2019)	Operation	To review the impacts of IWS system on drinking water microbiome	Authors reviewed the different studies related to the water quality in IWS system. Authors discussed the different features of IWS which impact the microbial quality of drinking water, like Impact of disinfection, impacts of stagnation, impacts of drained periods, impacts of backflow and intrusion, impact of air pockets and impact of storage.	Authors suggested a combination of controlled lab studies and field study is necessary to understand the impact of each feature of IWS on water quality.
59	Taylor et al. (2019)	Operation	To propose framework for understanding the persistence and operation of IWS system	Macroscopic model using average consumer and spatial average leakage rate was used to model supply system in IWS mode. Model relates consumer demand satisfaction, water availability at source, consumer demand and leakage. IWS was characterised by Duty cycle 't' .The validation of the macroscopic model was done with detailed modeling with four WDN. Case study from India was used to test the propos…	Degree of demand satisfaction is important to evaulated IWS system. Author concluded, once the demand is satisfied,threshold is achieved, leakage rate governs the supply of water instead of demand. Measuring the threshold value is important to imporve IWS system. Demand satisfaction can be used to determine the consumption quantity in IWS system. Without rehabilitation of the pipelines, the leaka…
60	Zyoud (2019)	Operation	To propose framework for comparing different MCDM techniques for water loss management in developing countries.	The existing water loss management stratergy developed by authors was discussed.Comparative study on conventional AHP, Fuzzy AHP and modified fuzzy AHP was done. Sensitivity analysis was done check the effect of variation of weights for the criteria. WDN of Nablus, Palestine was used as case study. Policy makers, organisation of water resource management and affected stakeholders were involved.	Applying different MCDM techniques does not improve the ranking of a alternative. Such framework helps in improving the understanding about the water loss issues, promotes maintaining accurate database system, encourages group decision making.
61	Al-Washali et al. (2020)	Operation	To review the different assessment methods of WL component for IWS system	Authors reviewed briefly and investigated four methods, developments, applications and uncertainties of WL component assessment using case studies from developing countries Zarqa,Jordan; Sana, Yeme;and Mwanza, Tanzania.	Least accurate method has less uncertainity, whereas realistic method has more uncertainity in calculating the water loss. That is, uncertainity analysis does not improve accuracy of a method. Cost of water loss varies depending upon the method adopted for assessment, which in turn affect the reduction methods. In developing countries, average volume of AL from top down water balance and water an…
62	David et al. (2020)	Operation	To analyse hybrid demand pattern on WDN with transition from IWS to CWS regime.	Hybrid demand pattern model was proposed for transition from IWS to CWS regime.WDN of Riberas de Sacramento, Chihuahua, Mexico was selected as case study. Consumption analysis was done using data from micro meters for consecutive three years. Hydraulic, social, demographic, topographic and consumption analysis was done in the study area.	Increase in leakage and water consumption to coversion to CWS will be reduced once the transition from IWS to CWS is complete and system is stablized.
63	Li et al. (2020)	Operation	To understand the impact on drinking water quality of the different coping strategies used in IWS system.	Data from water supply utilities and consumers was collected from two IWS system and two CWS system from Shandong and Huberi provinces, China (rural part of china). Data collection included water quality testing, interviews on behavioural adaptation, coping strategies,perception about water health and other metrics of consumer satisfaction.	In one case study, importance to convenient water supply is given over water quality, whereas other case study incovenient water supply with improved water quality is prefered. is Increased adaptive and protective behaviors at household level will improve the water quality.
64	Loubser et al (2020)	Operation	To propose indexing framework involving the causes and impacts associated with IWS system.	Authors proposed method evaluating the severity of IWS system. The severity assessment was based on supply duration, which gives intermittency ratio and number of affected connection to calculate connetion ratio. WDN of Mpumalanga province, South Africa was used as case study.	Higher population experiencing IWS system pise bigger challenge. System deficiency also contribute to IWS system like inadequate source, WTP capacity. deficiency in distribution network due to lack of skilled manpower, database management.The indices used for calculation of severity of IWS system should be modified as per requirement.
65	Rawas et al. (2020)	Operation	To compare the utility reported supply hours with the household experience in IWS system	Data from IBNET reported by water utilities of Peru was used in this study. Also, household survey was done to collect data related to consumer experience. Anlaysis was divided into two level national and regional. Binary values were assigned to the data from the two dataset for comparison.	Household based information provides accurate insights about the supply hours compared to the data by utilities. For example, advantage nodes get more supply hours compared to disadvantages nodes. More variation in household data was reported compared to utility data. There is lack of consistency in definition and reporting the reliability in data collection framework. In countries with IWS syste…
66	Sakomoto et al. (2020)	Operation	To provide solutions for improvement in water quality in IWS system	The study considers parameters lik pH, colour, turbidity, nitrate,nitrite, ammonia,sulphate, E coli, total coliform, COD and chlorine to quantify the water contamination. WDN of Mukono, Uganda was used as case study. EPANET was used for water quality modeling.	Combination of water quality monitoring and booster chlorination was suggested as remedy for improvement of water quality. Water contamination is directly proportional to leakages.

## Sheet: SI-2.3
Supplementary Information (SI-2)
SI-2.3 Literarture on revenue aspects of IWS system
Sr.no.	Authors	Criteria	Objective	Methodology	Findings
1	Rosenberg et al. (2007)	Economic	To model IWS system integrated with different consumer behaviour	Authors considered around 39 household actions regarding the improving the household water supply. Stochastic optimisation with reccourse decisions with forumulate and it was embed into Monte Carlo Simulation to considered relation between different consumer behaviour.WDN of Amman,Jordan was considered as case study.	Consumers have high WTP to avoid IWS regime. Governments should provide subsidizes on use of water conservation appliances. The model helped to understand the complexities and impacts of water use behaviour
2	Rosenberg (2010)	Economic	To identify the effect of different rate structures and schedule on water demand in IWS system	WDN of Amman, Jordan was considered as case study. Existing deductive model was used to simulate the response of consumer for uniform, increasing the block and linear prices to maximum and minimum value. Anlaysis was focused on the demand responses, economic efficiency, and recovery from users.	Deductive models and the rate structure simulation can be used to integrate various rate structure, pricing, conservation,water availability and household behaviour in iWS system.
3	Burt and Ray (2014)	Economic	To understand the effect of formal pipe network on the informal access practices by the consumers.	Household survey at Hubli Dharwad was conducted to understand the impact of 24*7 water supply project in the city. The survey was done to understand the socio economic status,demographic characteristics and willingness to pay for improved services.	Authors concluded there was willingness to pay from the consumers for improved water supply. However, most of the consumers still stored the water even after improved service and non payment of bills was continued. Consumers give importance to convenience and affordability over quality and continuous supply. Informal practices exists in transition phase of conversion from IWS to CWS.
4	Klassert et al. (2015)	Economic	To develop model for calculating the household water consumption by considering the effect of intermittency, storage, and pricing for piped and tanker water	Authors considered "tiered supply curve" to cater the effect of consumer surplus demand across different coping strategies. Agent based modelling was used to capture the interactions of heterogeneous household type. WDN of Amman, Jordan was considered as case study. Various parameters and variables were considered to develop the mathematical model like Piped water demand, piped water allocation, …	Authors highlighted the importance of spatial and social variation amongst the consumer affects the demand side management policies. The tanker feed water supply is widely used to overcome the shortcomings of piped water supply. The increase in water tariff for piped water supply reduces the consumption from tanker feed water supply. Storage facilities at household level are affected by increased…
5	Cook et al. (2016)	Economic	To develop methodology for understanding the coping costs in rural area of Kenya	Authors divided the coping costs into following components: time cost for collecting water outside the household premise, financial cost for paid sources, capitalised cost for household storage, diarrhea treatment cost, treatment of drinking water supply. Household survey was conducted and data from 387 households was recorded.	Authors reported the coping cost is more than 10% of the household income for more than half of the households. Coping costs is higher in wealthier households and those who do not have piped water supply at home. Households were iWS spend more one household storage and drinking water treatment methods.
6	Jayaramu et al. (2016)	Economic	To propose methdodology for improving cost recovery from Urban WSS in developin countries	WSS of Hubli Dharwad,India was considered as case study. Initially authors discussed the consequences of low cost recovery. Then elements affecting for the cost recovery in India were discussed. Multi pronged approach was used to improve the cost recovery in the study area. The model includes different parameters like improved customer services, tariff revision, reducing leakages,improved databas…	Meters improved the billing process. By using different technical operation and management options, the cost recovery improved but at very slow rate, reasons for it may be due to inappropiate staff behaviour, passive bureaucracy as well as politics.
7	Guragai et al. (2017)	Economic	To investigate the effect of unequal supply hours on consumers coping stratergy and perception about IWS regime in Kathmandu, Nepal.	Randomized household survey and water quality testing for 369 households was done. Lornez curve and Gini coefficient was used for statistical analysis of the data collected. Authors used studied following coping strategies used by consumers: purchasing tanker feed water, storage on water in large tanks, household treatment, household pumps and household expenses on water. Additionally consumers p…	Consumers have to spend more money on coping strategies. Consumers give preference to improvement in water quality followed by supply regularity, frequency and volume, pressure is last in the preference.
8	Kumpel et al. (2017)	Economic	To proposed methodology for measurement of household consumption in IWS system	Mixed method approach was proposed combining limited metered data, household storage inventories and structured observations. WDN of Hubli Dharwad, India was used as case study. Water access typology was developed based on the sample household interviews. Water loss at both household level and distribution system was measured.	Metered reading in IWS are not reliable to measure consumption, due to household storage tanks results in under registration of over registration due flow of air through pipe. Meters are shared by households. Equity can be improved by providing individual household connection, longer duration of supply, removal of overhead storage tank. Authors highlighted reduction in water loss in the distribut…
9	Reyes et al. (2017)	Economic	To assess the household consumption pattern in IWS system	WDN of Puerto Ayora, Galapagos Island was considered as case study. Household water meter were installed to collect the data regarding water consumption. In addition to it diary of domestic water appliance analysis was maintained for the households selected for the study. Authors tried to derive corelation between the schedul of distribution and wide range of consumption.	The fixed tariff structure might increase the wastage of water spillage of household storage tanks might be another reason for it. Inequity in the supply was reported. Water efficient applicances can help in reducing the demand of water.
10	Burt et al. (2018)	Economic	To develop methodology to compare users cost and benefits and distibution of the benefits among the users after conversion from IWS to CWS regime.	Hubli Dharwad, India was considerd as case study. Authors used matched cohort quasi experimental study to compare the wards with CWS regime to the wards with IWS regime. Total 4000 household survey was conducted over 15 months and extensive document analysis was performed. Parametric average and econmetric modeling was done on the coping costs, water bills and monthly water consumption post CWS c…	Upgradation to CWS system to take into account the equity of benefits, affordability of water and maintenance of system. If total cost recovery is done from the users and divided equally, then it will result in uneven distribution across socio economic strata. To sustain the CWS upgradation without additional water source, balance between reduction in NRW and increased consumption in CWS regime i…
11	Guragai et al. (2018)	Economic	To propose methodology for calculating the household water consumption using data loggers in IWS systen.	The study was conducted in Kathamandu, Nepal. Pressure data loggers were used to measure water levels in household storage tanks in the IWS system. Based on the water level of the household storage tank, daily water consumption was derived. Also, detail household survey was also conducted. Detailed water consumption profile was derived from the data.	Highest consumption was in Toilets, followed by kitchen, laundry,shower and other activities.Measuring the water level variation in the household storage using data loggers provide good results for consumption pattern. Application data loggers combined with household water usage record and micro scale measurement of water consumption can be very useful tool for demand management stratergy in IWS …

## Sheet: SI-2.4
Supplementary Information (SI-2)
SI-2.4 Institutional arrangement for water supply in Maharashtra, India ( Adopted from Institute of Resource analysis and policy, Hyderabad and CTARA, IIT Bombay, 2018)
